# Supplementary material
Source: ML conference proceedings conference paper supplement (https://openreview.net/forum?id=IGNcd02QrU)
Supplement: supplementary_material [file ValidAgent_EMAS2026_Demo_supp.pdf › ValidAgent_EMAS2026_Demo_supp.pdf]

# ValidAgent – An Open Repository of Validated Generative Agents for Behavioral Simulations and Multi-Agent Systems

Leon Lührs<sup>1,2</sup>[0009-0004-5550-1387], Christian Stindt von Dohm<sup>1,2</sup>[0009-0001-1818-7892], Anika Bittner<sup>1</sup>[0009-0004-7090-1557], Timo Heinrich<sup>1</sup>[0000-0001-6827-1374], and Matthias Meyer<sup>1,2</sup>[0000-0003-2980-4670]

<sup>1</sup> Hamburg University of Technology, Am Schwarzenberg-Campus 4, 21073 Hamburg, Germany

<sup>2</sup> United Nations University Hub on Engineering to Face Climate Change, Am Schwarzenberg-Campus 3, 21073 Hamburg, Germany  
leon.luehrs@tuhh.de

## Supplemental Material

The ValidAgent repository is available at: <https://tuhh-maccs.github.io/validagent/>.

### Agent Sets

Browse curated collections of behavioral agents organized by domain and research context. 3 sets · 66 agents total

|                                                  |                                                                                                                                                                                                                                      |                                                   |
|--------------------------------------------------|--------------------------------------------------------------------------------------------------------------------------------------------------------------------------------------------------------------------------------------|---------------------------------------------------|
| <b>Honesty Pilot Set</b><br>behavioral economics | 26 agents based on the Die-Roll Honesty Paradigm (Fischbacher & Föllmi-Heusi, 2013). Each agent represents a real human participant with...<br><span>Honest</span> <span>Dishonest</span> <span>High H-H</span> <span>Low H-H</span> | 26 agents behavioral <span>In Validation</span> > |
| <b>The Office Agents</b><br>workplace behavior   | 20 fictional personas from 'The Office' TV show demonstrating personality modeling and character simulation<br><span>Workplace</span> <span>Comedy</span> <span>Sales</span> <span>Management</span> +2                              | 20 agents demonstration Placeholder >             |
| <b>Example Agents</b><br>various                 | Demo agents for research concepts<br><span>Honesty</span> <span>Climate</span> <span>Social Norms</span> <span>Teaching</span> +4                                                                                                    | 20 agents demonstration Placeholder >             |

Fig. 1. Agent Sets

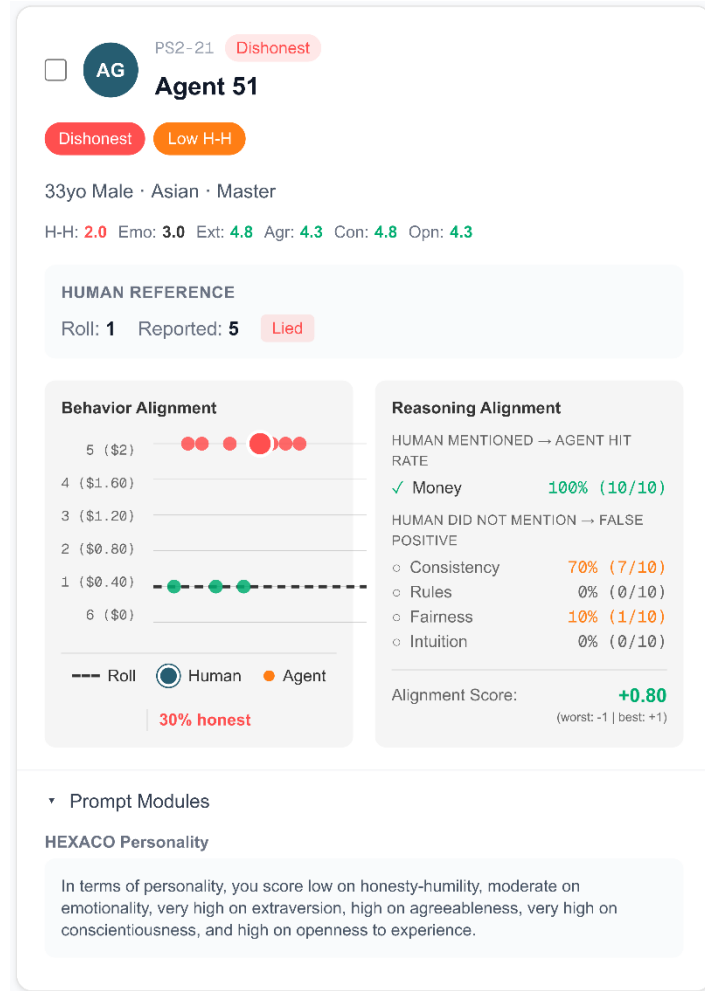

Fig. 2. Agent Card

Table 1. Generative Agent Simulation Frameworks

| Framework     | Persona Initialization Mechanism                      | Import Format                                       |
|---------------|-------------------------------------------------------|-----------------------------------------------------|
| GenAgents [1] | Narrative persona description + memory initialization | Background description + memory entries             |
| Concordia [2] | Narrative persona description + memory initialization | Description string + list of fact strings           |
| Sotopia [3]   | Scenario-based character specification                | Character fields embedded in scenario configuration |
| EDSL [4]      | Structured persona schema                             | JSON persona input                                  |
| OASIS [5]     | Agent profile specification within simulated platform | Agent profile fields in environment configuration   |

## References

1. Park, J.S., O’Brien, J., Cai, C.J., Morris, M.R., Liang, P., Bernstein, M.S.: Generative agents: Interactive simulacra of human behavior. In: Proceedings of the 36th Annual ACM Symposium on User Interface Software and Technology. Article no. 2. Association for Computing Machinery, New York, NY, USA (2023). <https://doi.org/10.1145/3586183.3606763>.
2. Vezhnevets, A.S., Agapiou, J.P., Aharon, A., Ziv, R., Matyas, J., Duéñez-Guzmán, E.A., Cunningham, W.A., Osindero, S., Karmon, D., Leibo, J.Z.: Generative agent-based modeling with actions grounded in physical, social, or digital space using Concordia (2023). <https://doi.org/10.48550/arXiv.2312.03664>.
3. Zhou, X., Zhu, H., Mathur, L., Zhang, R., Yu, H., Qi, Z., Morency, L.-P., Bisk, Y., Fried, D., Neubig, G., Sap, M.: SOTOPIA: Interactive evaluation for social intelligence in language agents (2024). <https://doi.org/10.48550/arXiv.2310.11667>.
4. Expected Parrot: EDSL Documentation: <https://www.expectedparrot.com/>, last accessed 2026/02/14.
5. Yang, Z., Zhang, Z., Zheng, Z., Jiang, Y., Gan, Z., Wang, Z., Ling, Z., Chen, J., Ma, M., Dong, B., Gupta, P., Hu, S., Yin, Z., Li, G., Jia, X., Wang, L., Ghanem, B., Lu, H., Lu, C., Ouyang, W., Qiao, Y., Torr, P., Shao, J.: OASIS: Open Agent Social Interaction Simulations with One Million Agents (2025). <https://doi.org/10.48550/arXiv.2411.11581>.
